# Supplementary material for: Silencing of the JNK pathway maintains progesterone receptor activity in decidualizing human endometrial stromal cells exposed to oxidative stress signals
Source: PubMed Central journal article supplement — FASEB J. 2010 May;24(5):1541–51. doi: 10.1096/fj.09-149153 (PMC2857868; doi:10.1096/fj.09-149153), 2010-05
Supplement: fj.09-149153_1.pdf [file fj.09-149153_1.pdf]

**Table S.I.** List of genes (50 most induced and 50 most repressed) uniquely regulated in undifferentiated HESCs upon treatment with H<sub>2</sub>O<sub>2</sub>.

| Induced genes     |                                                                                     |             | Repressed genes |                                                                                                                                            |             |
|-------------------|-------------------------------------------------------------------------------------|-------------|-----------------|--------------------------------------------------------------------------------------------------------------------------------------------|-------------|
| Gene Symbol       | Gene Name                                                                           | fold change | Gene Symbol     | Gene Name                                                                                                                                  | fold change |
| RRAD              | Ras-related associated with diabetes                                                | 10.5        | TRPC6           | Transient receptor potential cation channel, subfamily C, member 6                                                                         | -5.0        |
| EPC1              | Enhancer of polycomb homolog 1 (Drosophila)                                         | 5.9         | ASPM            | Asp (abnormal spindle)-like, microcephaly associated (Drosophila)                                                                          | -5.0        |
| ATF3              | Activating transcription factor 3                                                   | 5.2         | PLEKHK1         | Pleckstrin homology domain containing family K member 1                                                                                    | -4.7        |
| KITLG             | KIT ligand                                                                          | 4.5         | RUNX1T1         | Runt-related transcription factor 1; translocated to, 1 (cyclin D-related)                                                                 | -4.1        |
| TNFRSF10A         | Tumor necrosis factor receptor superfamily, member 10a                              | 4.4         | ROBO2           | Roundabout, axon guidance receptor, homolog 2 (Drosophila)                                                                                 | -4.1        |
| E2F7              | E2F transcription factor 7                                                          | 4.3         | STK6            | Serine/threonine kinase 6                                                                                                                  | -3.9        |
| ABL2              | v-abl Abelson murine leukaemia viral oncogene homolog 2 (arg, Abelson-related gene) | 4.3         | RBMS3           | RNA binding motif, single stranded interacting protein                                                                                     | -3.9        |
| SESN1             | Sestrin 1                                                                           | 4.2         | PDE5A           | Phosphodiesterase 5A, cGMP-specific                                                                                                        | -3.9        |
| C21orf91          | Chromosome 21 open reading frame 91                                                 | 4.0         | C6orf32         | Chromosome 6 open reading frame 32                                                                                                         | -3.8        |
| NPTX2             | Neuronal pentraxin II                                                               | 4.0         | ST6GAL2         | ST6 beta-galactosamide alpha-2,6-sialyltransferase 2                                                                                       | -3.8        |
| LOC346887         | Similar to solute carrier family 16 (monocarboxylic acid transporters), member 14   | 3.9         | CALD1           | Caldesmon 1                                                                                                                                | -3.8        |
| DYRK3             | Dual-specificity tyrosine-(Y)-phosphorylation regulated kinase 3                    | 3.8         | BNC2            | Basonuclin 2                                                                                                                               | -3.8        |
| AQP3              | Aquaporin 3                                                                         | 3.6         | TOP2A           | Topoisomerase (DNA) II alpha 170kDa                                                                                                        | -3.7        |
| ARL8              | ADP-ribosylation factor-like 8                                                      | 3.6         | SERTAD4         | SERTA domain containing 4                                                                                                                  | -3.6        |
| HMGA2             | High mobility group AT-hook 2; high mobility group AT-hook 2                        | 3.5         | VPS13B          | Vacuolar protein sorting 13B (yeast)                                                                                                       | -3.4        |
| CPM               | Carboxypeptidase M                                                                  | 3.4         | PRICKLE1        | Prickle-like 1 (Drosophila)                                                                                                                | -3.4        |
| RSL1D1            | Ribosomal L1 domain containing 1                                                    | 3.4         | THBS1           | Thrombospondin 1                                                                                                                           | -3.4        |
| LOC130502         | Similar to CG14894-PA                                                               | 3.4         | GNA14           | Guanine nucleotide binding protein (G protein), alpha 14                                                                                   | -3.3        |
| PEO1              | Progressive external ophthalmoplegia 1                                              | 3.4         | SPRY1           | Sprouty homolog 1, antagonist of FGF signalling (Drosophila)                                                                               | -3.3        |
| GCLM              | glutamate-cysteine ligase, modifier subunit                                         | 3.4         | ANKRD32         | Ankyrin repeat domain 32                                                                                                                   | -3.3        |
| SERPINB2          | Serp peptidase inhibitor, clade B (ovalbumin), member 2                             | 3.4         | MEOX1           | Mesenchyme homeo box 1                                                                                                                     | -3.2        |
| MAFF              | v-maf musculoaponeurotic fibrosarcoma oncogene homolog F (avian)                    | 3.3         | CCNB1           | Cyclin B1                                                                                                                                  | -3.2        |
| BTG2              | BTG family, member 2                                                                | 3.3         | SYNPO2          | Synaptopodin 2                                                                                                                             | -3.1        |
| Chromosome 6 open | Chromosome 6 open reading frame 160                                                 | 3.2         | AMSH-LP         | Associated molecule with the SH3 domain of STAM (AMSH) like protein                                                                        | -3.1        |
| LOC285958         | Hypothetical protein LOC285958                                                      | 3.2         | SEMA5A          | Sema domain, seven thrombospondin repeat (type 1 and type 1-like), transmembrane domain (TM) and short cytoplasmic domain, (semaphorin) 5A | -3.0        |
| HSUP1             | Similar to RPE-spondin                                                              | 3.2         | TCF4            | Transcription factor 4                                                                                                                     | -3.0        |
| KLF4              | Kruppel-like factor 4 (gut)                                                         | 3.2         | LRRN3           | Leucine rich repeat neuronal 3                                                                                                             | -3.0        |
| TNFRSF10B         | Tumor necrosis factor receptor superfamily, member 10b                              | 3.2         | MAML3           | Mastermind-like 3 (Drosophila)                                                                                                             | -3.0        |
| SPRY2             | Sprouty homolog 2 (Drosophila)                                                      | 3.1         | PTCH            | Patched homolog (Drosophila)                                                                                                               | -3.0        |
| RPL37A            | Ribosomal protein L37a                                                              | 3.1         | DLG7            | Discs, large homolog 7                                                                                                                     | -3.0        |

| (Drosophila) |                                                                                            |     |          |                                                                       |      |
|--------------|--------------------------------------------------------------------------------------------|-----|----------|-----------------------------------------------------------------------|------|
| SUM          | Eukaryotic translation initiation factor 1                                                 | 3.1 | MXRA5    | Matrix-remodeling associated 5                                        | -3.0 |
| C1orf55      | Chromosome 1 open reading frame 55                                                         | 3.0 | KIF11    | Kinesin family member 11                                              | -3.0 |
| SLC3A2       | Solute carrier family 3 (activators of dibasic and neutral amino acid transport), member 2 | 3.0 | DOCK4    | Dedicator of cytokinesis 4                                            | -3.0 |
| RPS28        | Ribosomal protein S28                                                                      | 3.0 | NR2F1    | Nuclear receptor subfamily 2, group F, member 1                       | -3.0 |
| TNFAIP6      | Tumor necrosis factor, alpha-induced protein 6                                             | 2.9 | TNFRSF19 | Tumor necrosis factor receptor superfamily, member 19                 | -3.0 |
| TFAM         | Transcription factor A, mitochondrial                                                      | 2.9 | DOC1     | Downregulated in ovarian cancer                                       | -3.0 |
| RNU47        | RNA, U47 small nuclear                                                                     | 2.9 | FLJ23514 | Hypothetical protein FLJ23514                                         | -2.9 |
| HSPB8        | Heat shock 22kDa protein 8                                                                 | 2.9 | FOXO1A   | Forkhead box O1A (rhabdomyosarcoma)                                   | -2.9 |
| CCRN4L       | CCR4 carbon catabolite repression 4-like ( <i>S. cerevisiae</i> )                          | 2.9 | KIF23    | Kinesin family member 23                                              | -2.9 |
| KIAA1718     | KIAA1718 protein                                                                           | 2.8 | TCF7L2   | Transcription factor 7-like 2 (T-cell specific, HMG-box)              | -2.9 |
| ZNF654       | Zinc finger protein 654                                                                    | 2.8 | NHLRC2   | NHL repeat containing 2                                               | -2.9 |
| TEX10        | Testis expressed sequence 10                                                               | 2.8 | PGRMC2   | Progesterone receptor membrane component 2                            | -2.9 |
| FBXO32       | F-box protein 32                                                                           | 2.8 | SLC16A7  | Solute carrier family 16 (monocarboxylic acid transporters), member 7 | -2.9 |
| RNU47; GAS5  | RNA, U47 small nuclear; growth arrest-specific 5                                           | 2.8 | FLJ30707 | Hypothetical protein FLJ30707                                         | -2.9 |
| NKX3-1       | NK3 transcription factor related, locus 1 ( <i>Drosophila</i> )                            | 2.8 | LOC90624 | Hypothetical protein LOC90624                                         | -2.8 |
| PHLDA3       | Pleckstrin homology-like domain, family A, member 3                                        | 2.8 | HOXA11   | Homeo box A11                                                         | -2.8 |
| FBXW7        | F-box and WD-40 domain protein 7 (archipelago homolog, <i>Drosophila</i> )                 | 2.8 | ITPR2    | Inositol 1,4,5-triphosphate receptor, type 2                          | -2.8 |
| MAK3         | Mak3 homolog ( <i>S. cerevisiae</i> )                                                      | 2.8 | NUDT12   | Nudix (nucleoside diphosphate linked moiety X)-type motif 12          | -2.8 |
| TOB1         | Transducer of ERBB2. 1                                                                     | 2.8 | ARHGAP18 | Rho GTPase activating protein 18                                      | -2.8 |
| SFRS1        | Splicing factor, arginine/serine-rich 1 (splicing factor 2, alternate splicing factor)     | 2.8 | IGFBP7   | Insulin-like growth factor binding protein 7                          | -2.8 |

**Table S.II.** List of genes (50 most induced and 50 most repressed) uniquely regulated in decidualized HESCs upon treatment with H<sub>2</sub>O<sub>2</sub>.

| Induced genes  |                                                                                                                                                  |             | Repressed genes |                                                           |             |
|----------------|--------------------------------------------------------------------------------------------------------------------------------------------------|-------------|-----------------|-----------------------------------------------------------|-------------|
| Gene Symbol    | Gene Name                                                                                                                                        | fold change | Gene Symbol     | Gene Name                                                 | fold change |
| BRE            | Brain and reproductive organ-expressed (TNFRSF1A modulator)                                                                                      | 6.8         | PLCL1           | Phospholipase C-like 1                                    | -4.0        |
| NR4A2          | Nuclear receptor subfamily 4, group A, member 2                                                                                                  | 6.6         | CCDC8           | Coiled-coil domain containing 8                           | -3.7        |
| AKR1C1         | Aldo-keto reductase family 1, member C1 (dihydrodiol dehydrogenase 1; 20-alpha (3-alpha)-hydroxysteroid dehydrogenase)                           | 5.2         | C18orf1         | Chromosome 18 open reading frame 1                        | -3.7        |
| AKR1C2         | Aldo-keto reductase family 1, member C2 (dihydrodiol dehydrogenase 2; bile acid binding protein; 3-alpha hydroxysteroid dehydrogenase, type III) | 4.8         | RGS2            | Regulator of G-protein signalling 2, 24kDa                | -3.4        |
| CMKOR1         | Chemokine orphan receptor 1                                                                                                                      | 4.7         | NDP             | Norrie disease (pseudoglioma)                             | -3.3        |
| ZNF267         | Zinc finger protein 267                                                                                                                          | 4.5         | LRRC16          | Leucine rich repeat containing 16                         | -3.2        |
| LMCD1          | LIM and cysteine-rich domains 1                                                                                                                  | 4.4         | CDC42EP3        | CDC42 effector protein (Rho GTPase binding) 3             | -3.1        |
| AHR            | Aryl hydrocarbon receptor                                                                                                                        | 4.3         | ITPR1           | Inositol 1,4,5-triphosphate receptor, type 1              | -3.0        |
| DUSP6          | Dual specificity phosphatase 6                                                                                                                   | 4.3         | NRXN1           | Neurexin 1                                                | -2.8        |
| IQCG           | IQ motif containing G                                                                                                                            | 4.1         | AOX1            | Aldehyde oxidase 1                                        | -2.8        |
| FRMD6          | FERM domain containing 6                                                                                                                         | 4.1         | SERPINB9        | Serpin peptidase inhibitor, clade B (ovalbumin), member 9 | -2.7        |
| KLHL24         | Kelch-like 24 (Drosophila)                                                                                                                       | 4.0         | EEF2K           | Eukaryotic elongation factor-2 kinase                     | -2.7        |
| GADD45G        | Growth arrest and DNA-damage-inducible, gamma                                                                                                    | 3.9         | ADAMTS9         | ADAM metallopeptidase with thrombospondin type 1 motif, 9 | -2.7        |
| GJA7           | Gap junction protein, alpha 7, 45kDa (connexin 45)                                                                                               | 3.8         | DOK6            | Docking protein 6                                         | -2.7        |
| BACH1          | BTB and CNC homology 1, basic leucine zipper transcription factor 1                                                                              | 3.8         | KIAA0367        | KIAA0367                                                  | -2.7        |
| YOD1           | YOD1 OUT deubiquinating enzyme 1 homolog (yeast)                                                                                                 | 3.7         | EBF             | Early B-cell factor                                       | -2.6        |
| PCDH9          | Protocadherin 9                                                                                                                                  | 3.6         | LOC286025       | Hypothetical protein LOC28602                             | -2.6        |
| SOD2           | Superoxide dismutase 2, mitochondrial                                                                                                            | 3.6         | KIAA0182        | KIAA0182 protein                                          | -2.6        |
| C6orf166       | Chromosome 6 open reading frame 166                                                                                                              | 3.5         | ZBTB20          | Zinc finger and BTB domain containing 20                  | -2.6        |
| PRDM1          | PR domain containing 1, with ZNF domain                                                                                                          | 3.4         | KIAA1377        | KIAA1377 protein                                          | -2.6        |
| PDE4B          | Phosphodiesterase 4B, cAMP-specific (phosphodiesterase E4 dunce homolog, Drosophila)                                                             | 3.4         | KALRN           | Kalirin, RhoGEF kinase                                    | -2.5        |
| AMPD3          | Adenosine monophosphate deaminase (isoform E)                                                                                                    | 3.4         | RORB            | RAR-related orphan receptor B                             | -2.5        |
| KLF6           | Kruppel-like factor 6                                                                                                                            | 3.4         | VSP13D          | Vacuolar protein sorting 13D (yeast)                      | -2.5        |
| CDKN2B         | Cyclin-dependent kinase inhibitor 2B (p15, inhibits CDK4)                                                                                        | 3.4         | KLHDC1          | Kelch domain containing 1                                 | -2.5        |
| YPEL2          | Yippee-like 2 (Drosophila)                                                                                                                       | 3.3         | BBX             | Bobby sox homlog (Drosophila)                             | -2.5        |
| CD44           | CD44 antigen (homing function and Indian blood group system)                                                                                     | 3.3         | GREB1           | GREB1 protein                                             | -2.5        |
| FGF7; FLJ30435 | Fibroblast growth factor 7 (keratinocyte growth factor); hypothetical protein FLJ30435                                                           | 3.3         | ZNF18           | Zinc finger protein 18 (KOX 11)                           | -2.4        |
| FGF2           | Fibroblast growth factor 2 (basic)                                                                                                               | 3.3         | PDLIM5          | PDZ and LIM domain 5                                      | -2.4        |
| PPP1R14C       | Protein phosphatase 1, regulatory (inhibitor) subunit 14C                                                                                        | 3.3         | NEXN            | Nexilin (F actin binding protein)                         | -2.4        |
| LRR8C          | Leucine rich repeat containing                                                                                                                   | 3.2         | EMX2            | Empty spiracles homolog 2                                 | -2.4        |

|           |                                                       |     |           |                                                               |      |
|-----------|-------------------------------------------------------|-----|-----------|---------------------------------------------------------------|------|
|           | 8 family, member C                                    |     |           | (Drosophila)                                                  |      |
| HIST1H2AE | Histone 1, H2ae                                       | 3.2 | COL4A6    | Collagen, type IV, alpha 6                                    | -2.4 |
| ARRDC3    | Arrestin domain containing 3                          | 3.2 | AUTS2     | Autism susceptibility candidate 2                             | -2.3 |
| DUSP10    | Dual specificity phosphatase 10                       | 3.1 | MBNL2     | Musclebind-like 2 (Drosophila)                                | -2.3 |
| RBBP6     | Retinoblastoma binding protein 6                      | 3.1 | HMGCR     | 3-hydroxy-3-methylglutaryl-Coenzyme A reductase               | -2.3 |
| KIAA0590  | WD and tetratricopeptide repeats 2                    | 3.1 | STAU2     | Staufen, RNA binding protein, homolog 2 (Drosophila)          | -2.3 |
| HIST1H3D  | Histone 1, H3d                                        | 3.1 | KCNE3     | Potassium voltage-gated channel, Isk-related family, member 3 | -2.3 |
| RORA      | RAR-related orphan receptor A                         | 3.1 | CDC42BPA  | CDC42 binding protein kinase alpha (DMPK-like)                | -2.3 |
| MGC29814  | Hypothetical protein MGC29814                         | 3.1 | CDKN1C    | Cyclin-dependent kinase inhibitor 1C (p57, Kip2)              | -2.3 |
| IL6R      | Interleukin 6 receptor                                | 3.1 | KAL1      | Kallmann syndrome 1 sequence                                  | -2.3 |
| CPEB2     | Cytoplasmic polyadenylation element binding protein 2 | 3.0 | CTGF      | Connective tissue growth factor                               | -2.2 |
| HLX1      | H2.0-like homeo box 1 (Drosophila)                    | 3.0 | PANK1     | Pantothenate kinase 1                                         | -2.2 |
| HIST2H2AA | Histone 2, H2aa                                       | 2.9 | MGC2474   | Hypothetical protein MGC2474                                  | -2.2 |
| ZNF297B   | Zinc finger protein 297B                              | 2.9 | HDAC4     | Histone deacetylase 4                                         | -2.2 |
| LOC91614  | Novel 58.3 KDA protein                                | 2.8 | ACACB     | Acetyl-Coenzyme A carboxylase beta                            | -2.2 |
| AK3L1     | Adeylate kinase 3-like 1                              | 2.8 | MBNL2     | Musclebind-like 2 (Drosophila)                                | -2.2 |
| LOC162073 | Hypothetical protein LOC162073                        | 2.8 | LOC220929 | Hypothetical protein LOC220929                                | -2.2 |
| C20orf82  | Chromosome 20 open reading frame 82                   | 2.8 | THAP8     | THAP domain containing 8                                      | -2.2 |
| RUNX2     | Runt-related transcription factor                     | 2.8 | LAMA2     | Laminin, alpha 2 (merosin, congenital muscular dystrophy)     | -2.2 |
| SQSTM1    | Sequestosome 1                                        | 2.8 | SORCS1    | Sortilin-related VPS10 domain containing receptor 1           | -2.2 |
| LARP2     | La ribonucleoprotein domain family, member 2          | 2.7 | SFRS3     | Splicing factor, arginine/serine-rich 3                       | -2.2 |

**Table S.III.** List of genes (50 most induced and the 43 repressed) regulated in both undifferentiated and decidualized HESCs upon treatment with H<sub>2</sub>O<sub>2</sub>.

| Induced genes |                                                                                           |             | Repressed genes |                                                                                  |             |
|---------------|-------------------------------------------------------------------------------------------|-------------|-----------------|----------------------------------------------------------------------------------|-------------|
| Gene Symbol   | Gene Name                                                                                 | fold change | Gene Symbol     | Gene Name                                                                        | fold change |
| HMOX1         | Heme oxygenase (decycling) 1                                                              | 24.2/23.1   | I3CDNA73        | Hypothetical protein CG003                                                       | -6.8/-5.3   |
| GDF15         | Growth differentiation factor 15                                                          | 12.5/10.6   | RBMS3           | RNA binding motif, single stranded interacting protein                           | -3.3/-3.2   |
| IL8           | Interleukin 8                                                                             | 4.4/7.2     | MYH10           | Myosin, heavy polypeptide 10, non-muscle                                         | -3.9/-3.1   |
| KLHL21        | Kelch-like 21 (drosophila)                                                                | 7.4/6.8     | CALD1           | Caldesmon 1                                                                      | -3.3/-3.0   |
| GEM           | GTP binding protein overexpressed in skeletal muscle                                      | 5.1/6.4     | COL1A1          | Collagen, type I, alpha 1                                                        | -2.1/-3.0   |
| ATF3          | Activating transcription factor 3                                                         | 6.3/6.3     | COL12A1         | Collagen, type XII, alpha 1                                                      | -3.0/-3.0   |
| MGC5370       | Hypothetical protein MGC5370                                                              | 6.8/6.2     | VPS13B          | Vacuolar protein sorting 13B (yeast)                                             | -3.0/-2.9   |
| CDKN1A        | Cyclin-dependent kinase inhibitor 1A (p21, Cip1)                                          | 2.3/5.7     | TCF7L2          | Transcription factor 7-like 2 (T-cell specific, HMG-box)                         | -3.0/-2.9   |
| PPP1R15A      | Protein phosphatase 1, regulatory (inhibitor) subunit 15A                                 | 4.5/5.7     | ZBTB20          | Zinc finger and BTB domain containing 20                                         | -2.6/-2.9   |
| TRIB1         | Tribbles homolog 1 (Drosophila)                                                           | 2.3/5.4     | ARHGAP18        | Rho GTPase activating protein 18                                                 | -2.6/-2.8   |
| DUSP5         | Dual specificity phosphatase 5                                                            | 4.1/5.2     | MEIS1           | Meis1, myeloid ecotropic viral integration site 1 homolog (mouse)                | -2.5/-2.8   |
| MAFF          | v-maf musculoaponeurotic fibrosarcoma oncogene homolog F (avian)                          | 2.4/5.0     | LPP             | LIM domain containing preferred translocation partner in lipoma                  | -2.9/-2.8   |
| FOSL1         | FOS-like antigen 1                                                                        | 4.8/4.9     | PPM1H           | Protein phosphatase 1H (PP2C domain containing)                                  | -2.7/-2.7   |
| KIAA1754      | KIAA1754                                                                                  | 4.1/4.7     | TXNIP           | Thioredoxin interacting protein                                                  | -2.6/-2.7   |
| BMP2          | Bone morphogenetic protein 2                                                              | 2.4/4.5     | FZD2            | Frizzled homolog 2 (Drosophila)                                                  | -2.7/-2.7   |
| PMAIP1        | Phorbol-12-myristate-13-acetate-induced protein 1                                         | 3.2/4.5     | COL3A1          | Collagen, type III, alpha 1 (Ehlers-Danlos syndrome type IV, autosomal dominant) | -3.0/-2.7   |
| HIST1H2BG     | Histone 1, H2bg                                                                           | 3.6/4.5     | KCND2           | Potassium voltage-gated channel, Shal-related subfamily, member 2                | -3.0/-2.6   |
| JMY           | Junction-mediating and regulatory protein                                                 | 3.3/4.4     | AGPS            | Alkylglycerone phosphate synthase                                                | -2.6/-2.6   |
| DKFZP564I0422 | THAP domain containing, apoptosis associated protein 2                                    | 3.1/4.4     | NLGN4X          | Neurologin 4, X-linked                                                           | -2.8/-2.6   |
| TNFRSF10D     | Tumor necrosis factor receptor superfamily, member 10d, decoy with truncated death domain | 5.2/4.3     | ESR1            | Estrogen receptor 1                                                              | -3.2/-2.6   |
| PPF           | Peptidylprolyl isomerase F (cyclophilin F)                                                | 6.1/4.3     | KIAA1043        | KIAA1043 protein                                                                 | -2.9/-2.6   |
| GADD45A       | Growth arrest and DNA-damage inducible, alpha                                             | 3.7/4.3     | DIAPH2          | Diaphanous homolog 2 (Drosophila)                                                | -2.5/-2.5   |
| PLK2          | Polo-like kinase 2 (Drosophila)                                                           | 3.7/4.2     | LRBA            | LPS-responsive vesicle trafficking, beach and anchor containing                  | -2.6/-2.5   |
| RPM1D         | Protein phosphatase 1D magnesium-dependent, delta isoform                                 | 5.8/4.2     | UTRN            | Utrophin (homologous to dystrophin)                                              | -2.4/-2.5   |
| LOC284801     | Hypothetical protein LOC284801                                                            | 5.3/3.9     | FBN1            | Fibrillin 1 (Marfan syndrome)                                                    | -2.4/-2.5   |
| TNFALP6       | Tumor necrosis factor, alpha-induced protein 6                                            | 3.1/3.8     | NBEA            | Neurobeachin                                                                     | -2.6/-2.5   |
| IRAK2         | Interleukin-1 receptor-associated kinase 2                                                | 3.2/3.8     | CSPG2           | Chondroitin sulphate proteoglycan 2 (versican)                                   | -2.5/-2.4   |
| TM4SF1        | Transmembrane 4 L six family member 1                                                     | 3.3/3.7     | LMOD1           | Leiomodlin 1 (smooth muscle)                                                     | -2.0/-2.4   |
| SRXN1         | Sulfiredoxin 1 homolog (S.                                                                | 4.6/3.7     | TWIST2          | Twist homolog 2                                                                  | -2.4/-2.3   |

|           |                                                                                                                        |         |                             |                                                                                                                                                               |           |
|-----------|------------------------------------------------------------------------------------------------------------------------|---------|-----------------------------|---------------------------------------------------------------------------------------------------------------------------------------------------------------|-----------|
|           | cervisiae)                                                                                                             |         |                             | (Drosophila)                                                                                                                                                  |           |
| SLC30A1   | Solute carrier family 30 (zinc transporter), member 1                                                                  | 4.9/3.6 | GM632                       | KIAA1196 protein                                                                                                                                              | -2.3/-2.3 |
| FRMD4A    | FERM domain containing 4A                                                                                              | 3.4/3.6 | CSPG2                       | Chondroitin sulphate proteoglycan 2 (versican)                                                                                                                | -2.5/-2.3 |
| SESN2     | Sestrin2                                                                                                               | 4.6/3.6 | DHTKD1                      | Dehydrogenase E1 and transketolase domain containing 1                                                                                                        | -2.4/-2.3 |
| AKR1C1    | Aldo-keto reductase family 1, member C1 (dihydrodiol dehydrogenase 1; 20-alpha (3-alpha)-hydroxysteroid dehydrogenase) | 3.1/3.5 | HNRPA3P1; HNRPA3; LOC387933 | Heterogeneous nuclear ribonucleoprotein A3 pseudogene 1; heterogeneous nuclear ribonuclease protein A3; similar to heterogeneous nuclear ribonucleoprotein A3 | -2.1/-2.3 |
| ABL2      | V-abl Abelson murine leukaemia viral oncogene homolog 2 (arg. Abelson-related gene)                                    | 3.3/3.4 | ITSN1                       | Intersectin 1 (SH3 domain protein)                                                                                                                            | -3.4/-2.2 |
| MT1E      | Metallothionein 1E (functional)                                                                                        | 3.6/3.4 | AP1GBP1                     | AP1 gamma subunit binding protein 1                                                                                                                           | -2.3/-2.2 |
| ERN1      | Endoplasmic reticulum to nucleus signalling 1                                                                          | 2.5/3.4 | Sep-11                      | Septin 11                                                                                                                                                     | -2.3/-2.2 |
| ISG20L1   | Interferon stimulated exonuclease gene 20kDa-like 1                                                                    | 3.1/3.4 | ID4                         | Inhibitor of DNA binding 4, dominant negative helix-loop-helix protein                                                                                        | -2.1/-2.2 |
| BICD1     | Bicaudal D homolog 1 (Drosophila)                                                                                      | 2.3/3.4 | HOXA11                      | Homeo box A1                                                                                                                                                  | -2.2/-2.1 |
| RGS20     | Regulator of G-protein signalling 20                                                                                   | 2.8/3.4 | LDLR                        | Low density lipoprotein receptor (familial hypercholesterolemia)                                                                                              | -2.1/-2.1 |
| KCNK1     | Potassium channel, subfamily K, member 1                                                                               | 3.6/3.3 | ATR                         | Ataxia telangiectasia and Rad3 related                                                                                                                        | -2.1/-2.1 |
| FGF2      | Fibroblast growth factor 2 (basic)                                                                                     | 2.4/3.2 | LNPEP                       | Leucyl/cystinyl aminopeptidase                                                                                                                                | -2.2/-2.1 |
| KLHL24    | Kelch-like 24 (Drosophila)                                                                                             | 2.0/3.2 | BBX                         | Bobby sox homolog (Drosophila)                                                                                                                                | -2.2/-2.1 |
| MT1H      | Metallothionein 1H                                                                                                     | 3.1/3.2 | LGR7                        | Leucine-rich repeat-containing G protein-coupled receptor 7                                                                                                   | -2.1/-2.1 |
| ZNF468    | Zinc finger protein ZNF468                                                                                             | 2.5/3.1 |                             |                                                                                                                                                               |           |
| HIST1H2BD | Histone 1, H2bd                                                                                                        | 2.7/3.1 |                             |                                                                                                                                                               |           |
| POLH      | Polymerase (DNA directed), eta                                                                                         | 3.4/3.1 |                             |                                                                                                                                                               |           |
| MT1K      | Metallothionein 1M                                                                                                     | 3.0/3.1 |                             |                                                                                                                                                               |           |
| NLK       | Nemo like kinase                                                                                                       | 2.7/3.1 |                             |                                                                                                                                                               |           |
| ARL7      | ADP-ribosylation factor-like 7                                                                                         | 2.5/3.0 |                             |                                                                                                                                                               |           |
| ETS1      | v-ets erythroblastosis virus E26 oncogene homolog 1 (avian)                                                            | 3.0/3.0 |                             |                                                                                                                                                               |           |



**Fig S1C**

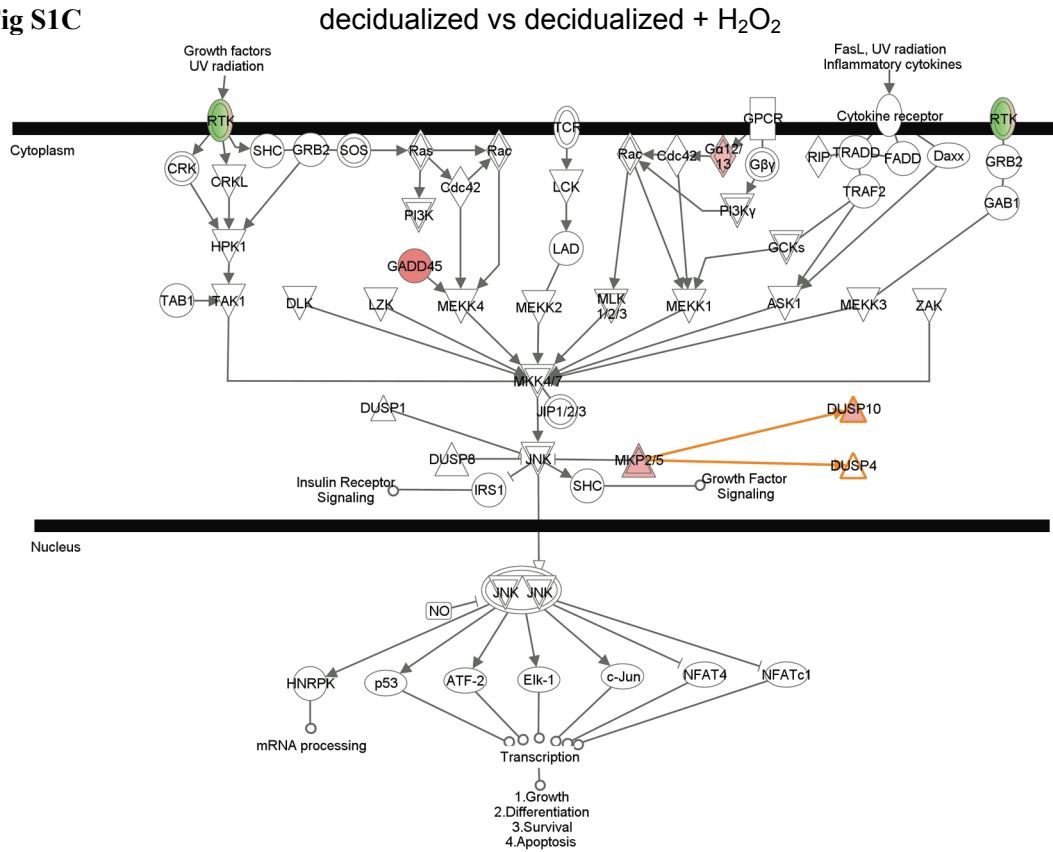

**Figure S1.** Ingenuity Pathway Analysis for the microarray data focusing on the JNK signaling pathway. The diagrams depict genes upregulated (red) or downregulated (green) upon decidualization (A), treatment of undifferentiated HESCs with H<sub>2</sub>O<sub>2</sub> (B), and treatment of decidualized HESCs with H<sub>2</sub>O<sub>2</sub> (C). ∇ represents genes encoding kinases and Δ represents genes encoding phosphatases while a double contour line signifies a gene family.
